# Supplementary material for: Flexible covalent tripods in nonadentate podands: synthesis of tris[3-(6-diethylcarbamoylpyridine-2-carboxamido)propyl]amine and its complexing properties with trivalent lanthanides†
Source: Royal Society of Chemistry journal article supplement (doi:10.1039/b101118i), 2001-01-01
Supplement: b101118i.doc [file b101118i.doc]

**Flexible covalent tripods in nonadentate podands: synthesis of tris{3-[*N*-methylcarbamoyl-(6-(*N,N*-diethylcarbamoyl)pyridine-2)propyl]amine} and its complexing properties with trivalent lanthanides.**

________________________________________________________________________________

Fabien Renaud, Carole Decurnex, Claude Piguet,* and Gérard Hopfgartner

**Supporting Information**

**Table S1.** Molecular peaks of complexes and adduct ions observed during the ESI-MS titrations of L14 and [L14+H]+ with Ln(ClO4)3 (Ln = La, Sm, Y, Lu) in acetonitrile (total ligand concentration: 10-4 M).

| Metal | TfOHa | Cation | m/zb | Metal | TfOHa | Cation | m/zb |
| --- | --- | --- | --- | --- | --- | --- | --- |
| LaIII | 0 | [La(L14)]3+ | 327.1 | LaIII | 1 | [La(L14+H)]4+ | 245.6 |
|  |  | [La(L14)(ClO4)]2+ | 540.2 |  |  | [La(L14+H)(TfO)]3+ | 377.1 |
|  |  | [La(L14)(ClO4)2]+ | 1179.3 |  |  | [La(L14+H)(TfO)2]2+ | 640.2 |
|  |  | [La(L14)2]3+ | 608.0 |  |  | [La(L14+H)(ClO4)]3+ | 360.5 |
| SmIII | 0 | [Sm(L14)]3+ | 331.5 |  |  | [La(L14+H)(ClO4)2]2+ | 590.2 |
|  |  | [Sm(L14)(ClO4)]2+ | 546.7 |  |  | [La(L14+H)(TfO)(ClO4)]2+ | 615.2 |
|  |  | [Sm(L14)(ClO4)2]+ | 1192.3 | SmIII | 1 | [Sm(L14+H)]4+ | 248.9 |
|  |  | [Sm(L14)2]3+ | 612.3 |  |  | [Sm(L14+H)(TfO)]3+ | 381.5 |
| YIII | 0 | [Y(L14)]3+ | 310.8 |  |  | [Sm(L14+H)(TfO)2]2+ | 646.7 |
|  |  | [Y(L14)(ClO4)]2+ | 515.7 |  |  | [Sm(L14+H)(ClO4)]3+ | 364.8 |
|  |  | [Y(L14)(ClO4)2]+ | 1130.3 |  |  | [Sm(L14+H)(ClO4)2]2+ | 596.7 |
|  |  | [Y(L14)2]3+ | 591.7 |  |  | [Sm(L14+H)(TfO)(ClO4)]2+ | 621.7 |
| LuIII | 0 | [Lu(L14)]3+ | 339.1 | YIII | 1 | [Y(L14+H)]4+ | 233.4 |
|  |  | [Lu(L14)(ClO4)]2+ | 558.2 |  |  | [Y(L14+H)(TfO)]3+ | 360.8 |
|  |  | [Lu(L14)(ClO4)2]+ | 1215.3 |  |  | [Y(L14+H)(TfO)2]2+ | 615.7 |
|  |  | [Lu(L14)2]3+ | 620.0 |  |  | [Y(L14+H)(ClO4)]3+ | 344.1 |
|  |  |  |  |  |  | [Y(L14+H)(ClO4)2]2+ | 565.7 |
|  |  |  |  |  |  | [Y(L14+H)(TfO)(ClO4)]2+ | 590.7 |
|  |  |  |  | LuIII | 1 | [Lu(L14+H)]4+ | 254.6 |
|  |  |  |  |  |  | [Lu(L14+H)(TfO)]3+ | 389.1 |
|  |  |  |  |  |  | [Lu(L14+H)(TfO)2]2+ | 658.2 |
|  |  |  |  |  |  | [Lu(L14+H)(ClO4)]3+ | 372.5 |
|  |  |  |  |  |  | [Lu(L14+H)(ClO4)2]2+ | 608.2 |
|  |  |  |  |  |  | [Lu(L14+H)(TfO)(ClO4)]2+ | 633.2 |

a Equivalent of added trifluoromethanesulfonic acid (TfOH) per metal ion. b m/z values given for the maximum of the peak at unit mass resolution
